# Supplementary material
Source: publisher figshare collection journal article supplement (https://acs.figshare.com/ndownloader/files/4266178)
Supplement: Supplementary file 1 [file 4266178]

 
data_wyp2
 
_audit_creation_method            SHELXL-97 
_chemical_name_systematic 
; 
 ? 
; 
_chemical_name_common             ? 
_chemical_melting_point           ? 
_chemical_formula_moiety          ? 
_chemical_formula_sum 
 'C44 H26 F12 N2 O9 S Zn2' 
_chemical_formula_weight          1117.47 
 
loop_ 
 _atom_type_symbol 
 _atom_type_description 
 _atom_type_scat_dispersion_real 
 _atom_type_scat_dispersion_imag 
 _atom_type_scat_source 
 'C'  'C'   0.0033   0.0016 
 'International Tables Vol C Tables 4.2.6.8 and 6.1.1.4' 
 'H'  'H'   0.0000   0.0000 
 'International Tables Vol C Tables 4.2.6.8 and 6.1.1.4' 
 'N'  'N'   0.0061   0.0033 
 'International Tables Vol C Tables 4.2.6.8 and 6.1.1.4' 
 'O'  'O'   0.0106   0.0060 
 'International Tables Vol C Tables 4.2.6.8 and 6.1.1.4' 
 'F'  'F'   0.0171   0.0103 
 'International Tables Vol C Tables 4.2.6.8 and 6.1.1.4' 
 'S'  'S'   0.1246   0.1234 
 'International Tables Vol C Tables 4.2.6.8 and 6.1.1.4' 
 'Zn'  'Zn'   0.2839   1.4301 
 'International Tables Vol C Tables 4.2.6.8 and 6.1.1.4' 
 
_symmetry_cell_setting            Monoclinic
_symmetry_space_group_name_H-M    P21/n
 
loop_ 
 _symmetry_equiv_pos_as_xyz 
 'x, y, z' 
 '-x+1/2, y+1/2, -z+1/2' 
 '-x, -y, -z' 
 'x-1/2, -y-1/2, z-1/2' 
 
_cell_length_a                    12.3826(5) 
_cell_length_b                    13.7119(5) 
_cell_length_c                    26.2216(10) 
_cell_angle_alpha                 90.00 
_cell_angle_beta                  92.0750(10) 
_cell_angle_gamma                 90.00 
_cell_volume                      4449.2(3) 
_cell_formula_units_Z             4 
_cell_measurement_temperature     296(2) 
_cell_measurement_reflns_used     ? 
_cell_measurement_theta_min       ? 
_cell_measurement_theta_max       ? 
 
_exptl_crystal_description        ? 
_exptl_crystal_colour             ? 
_exptl_crystal_size_max           0.29 
_exptl_crystal_size_mid           0.13 
_exptl_crystal_size_min           0.10 
_exptl_crystal_density_meas       ? 
_exptl_crystal_density_diffrn     1.668 
_exptl_crystal_density_method     'not measured' 
_exptl_crystal_F_000              2240 
_exptl_absorpt_coefficient_mu     1.234 
_exptl_absorpt_correction_type    Multi-scan 
_exptl_absorpt_correction_T_min   0.825 
_exptl_absorpt_correction_T_max   0.844 
_exptl_absorpt_process_details    ? 
 
_exptl_special_details 
; 
 ? 
; 
 
_diffrn_ambient_temperature       296(2) 
_diffrn_radiation_wavelength      0.71073 
_diffrn_radiation_type            MoK\a 
_diffrn_radiation_source          'fine-focus sealed tube' 
_diffrn_radiation_monochromator   graphite 
_diffrn_measurement_device_type   ? 
_diffrn_measurement_method        ? 
_diffrn_detector_area_resol_mean  ? 
_diffrn_standards_number          ? 
_diffrn_standards_interval_count  ? 
_diffrn_standards_interval_time   ? 
_diffrn_standards_decay_%         ? 
_diffrn_reflns_number             22492 
_diffrn_reflns_av_R_equivalents   0.0201 
_diffrn_reflns_av_sigmaI/netI     0.0219 
_diffrn_reflns_limit_h_min        -14 
_diffrn_reflns_limit_h_max        14 
_diffrn_reflns_limit_k_min        -15 
_diffrn_reflns_limit_k_max        16 
_diffrn_reflns_limit_l_min        -31 
_diffrn_reflns_limit_l_max        27 
_diffrn_reflns_theta_min          1.55 
_diffrn_reflns_theta_max          25.10 
_reflns_number_total              7920 
_reflns_number_gt                 6868 
_reflns_threshold_expression      >2sigma(I) 
 
_computing_data_collection        ? 
_computing_cell_refinement        ? 
_computing_data_reduction         ? 
_computing_structure_solution     'SHELXS-97 (Sheldrick, 1990)' 
_computing_structure_refinement   'SHELXL-97 (Sheldrick, 1997)' 
_computing_molecular_graphics     ? 
_computing_publication_material   ? 
 
_refine_special_details 
; 
 Refinement of F^2^ against ALL reflections.  The weighted R-factor wR and 
 goodness of fit S are based on F^2^, conventional R-factors R are based 
 on F, with F set to zero for negative F^2^. The threshold expression of 
 F^2^ > 2sigma(F^2^) is used only for calculating R-factors(gt) etc. and is 
 not relevant to the choice of reflections for refinement.  R-factors based 
 on F^2^ are statistically about twice as large as those based on F, and R- 
 factors based on ALL data will be even larger. 
; 
 
_refine_ls_structure_factor_coef  Fsqd  
_refine_ls_matrix_type            full 
_refine_ls_weighting_scheme       calc  
_refine_ls_weighting_details 
 'calc w=1/[\s^2^(Fo^2^)+(0.1046P)^2^+8.1410P] where P=(Fo^2^+2Fc^2^)/3' 
_atom_sites_solution_primary      direct 
_atom_sites_solution_secondary    difmap 
_atom_sites_solution_hydrogens    geom 
_refine_ls_hydrogen_treatment     mixed 
_refine_ls_extinction_method      none 
_refine_ls_extinction_coef        ? 
_refine_ls_number_reflns          7920 
_refine_ls_number_parameters      647 
_refine_ls_number_restraints      16 
_refine_ls_R_factor_all           0.0579 
_refine_ls_R_factor_gt            0.0511 
_refine_ls_wR_factor_ref          0.1654 
_refine_ls_wR_factor_gt           0.1576 
_refine_ls_goodness_of_fit_ref    1.044 
_refine_ls_restrained_S_all       1.051 
_refine_ls_shift/su_max           0.067 
_refine_ls_shift/su_mean          0.001 
 
loop_ 
 _atom_site_label 
 _atom_site_type_symbol 
 _atom_site_fract_x 
 _atom_site_fract_y 
 _atom_site_fract_z 
 _atom_site_U_iso_or_equiv 
 _atom_site_adp_type 
 _atom_site_occupancy 
 _atom_site_symmetry_multiplicity 
 _atom_site_calc_flag 
 _atom_site_refinement_flags 
 _atom_site_disorder_assembly 
 _atom_site_disorder_group 
O3 O 0.4514(2) 0.0612(2) 0.57913(9) 0.0369(6) Uani 1 1 d . . . 
C17 C 0.5482(3) 0.0816(2) 0.57346(13) 0.0284(8) Uani 1 1 d . . . 
C14 C 0.6081(3) 0.1350(2) 0.61557(12) 0.0263(7) Uani 1 1 d . . . 
C15 C 0.7198(3) 0.1350(3) 0.61793(13) 0.0294(7) Uani 1 1 d . . . 
H15 H 0.7572 0.0999 0.5939 0.035 Uiso 1 1 calc R . . 
C13 C 0.5532(3) 0.1878(3) 0.65160(14) 0.0354(9) Uani 1 1 d . . . 
H13 H 0.4781 0.1877 0.6507 0.042 Uiso 1 1 calc R . . 
C12 C 0.6096(3) 0.2406(3) 0.68874(14) 0.0338(8) Uani 1 1 d . . . 
H12 H 0.5721 0.2770 0.7122 0.041 Uiso 1 1 calc R . . 
C16 C 0.7766(3) 0.1860(3) 0.65524(13) 0.0295(8) Uani 1 1 d . . . 
H16 H 0.8517 0.1845 0.6563 0.035 Uiso 1 1 calc R . . 
C11 C 0.7226(3) 0.2396(3) 0.69130(12) 0.0252(7) Uani 1 1 d . . . 
O7 O 0.0716(2) 0.2481(2) 0.56258(10) 0.0375(6) Uani 1 1 d . . . 
O8 O -0.0397(2) 0.12424(19) 0.55820(9) 0.0330(6) Uani 1 1 d . . . 
C34 C 0.0378(3) 0.1703(3) 0.58060(13) 0.0300(8) Uani 1 1 d . . . 
C31 C 0.0875(3) 0.1296(3) 0.62911(13) 0.0282(7) Uani 1 1 d . . . 
C32 C 0.0550(3) 0.0396(3) 0.64671(15) 0.0399(9) Uani 1 1 d . . . 
H32 H 0.0061 0.0026 0.6272 0.048 Uiso 1 1 calc R . . 
C30 C 0.1644(3) 0.1820(3) 0.65717(14) 0.0328(8) Uani 1 1 d . . . 
H30 H 0.1891 0.2414 0.6450 0.039 Uiso 1 1 calc R . . 
O4 O 0.5999(2) 0.0621(2) 0.53436(10) 0.0425(7) Uani 1 1 d . . . 
N2 N 0.3465(2) 1.1731(2) 1.02277(12) 0.0324(7) Uani 1 1 d . . . 
C43 C 0.2424(3) 1.1976(3) 1.02811(16) 0.0388(9) Uani 1 1 d . . . 
H43 H 0.2218 1.2621 1.0225 0.047 Uiso 1 1 calc R . . 
C42 C 0.3747(3) 1.0805(3) 1.03241(16) 0.0390(9) Uani 1 1 d . . . 
H42 H 0.4469 1.0631 1.0297 0.047 Uiso 1 1 calc R . . 
C44 C 0.1647(3) 1.1308(3) 1.04162(18) 0.0459(10) Uani 1 1 d . A . 
H44 H 0.0930 1.1498 1.0444 0.055 Uiso 1 1 calc R . . 
C41 C 0.3020(4) 1.0094(3) 1.04616(17) 0.0452(10) Uani 1 1 d . A . 
H41 H 0.3246 0.9455 1.0520 0.054 Uiso 1 1 calc R . . 
Zn1 Zn 0.45639(4) 0.27704(3) 0.998756(17) 0.03586(13) Uani 1 1 d U . . 
Zn2 Zn 0.15064(3) 0.51104(3) 0.975381(16) 0.03237(13) Uani 1 1 d . . . 
O5 O 0.3409(2) 0.34286(18) 0.95201(10) 0.0336(6) Uani 1 1 d U . . 
O1 O 0.5728(2) 0.35912(19) 0.95428(9) 0.0338(6) Uani 1 1 d . . . 
C25 C 0.2179(3) 0.0212(3) 0.77410(14) 0.0320(8) Uani 1 1 d . . . 
O6 O 0.1733(2) 0.38768(18) 0.92996(9) 0.0308(5) Uani 1 1 d U . . 
O2 O 0.5493(2) 0.20188(19) 0.94532(9) 0.0309(5) Uani 1 1 d . . . 
O9 O 0.3104(2) 0.5260(2) 0.98191(12) 0.0402(7) Uani 1 1 d D . . 
C8 C 0.7824(3) 0.3043(3) 0.73150(13) 0.0260(7) Uani 1 1 d . . . 
F4 F 0.9447(2) 0.3148(2) 0.78266(10) 0.0573(7) Uani 1 1 d . . . 
N1 N 0.1383(2) 0.6529(2) 1.01068(12) 0.0310(7) Uani 1 1 d . A . 
F6 F 0.9030(2) 0.17496(19) 0.75167(10) 0.0516(6) Uani 1 1 d . . . 
C18 C 0.2534(3) 0.3336(2) 0.92588(12) 0.0248(7) Uani 1 1 d . . . 
F5 F 0.96378(19) 0.2865(2) 0.70349(11) 0.0585(8) Uani 1 1 d . . . 
C28 C 0.1693(3) 0.0578(3) 0.72254(13) 0.0289(7) Uani 1 1 d . . . 
C23 C 0.1519(3) 0.1741(3) 0.81670(13) 0.0297(8) Uani 1 1 d . . . 
H23 H 0.0922 0.1711 0.7942 0.036 Uiso 1 1 calc R . . 
F1 F 0.6890(2) 0.45016(19) 0.70863(11) 0.0554(7) Uani 1 1 d . . . 
C1 C 0.5865(3) 0.2817(3) 0.92981(13) 0.0297(8) Uani 1 1 d . . . 
F2 F 0.8537(2) 0.46828(18) 0.73416(10) 0.0521(6) Uani 1 1 d . . . 
C2 C 0.6411(3) 0.2863(3) 0.87969(13) 0.0302(8) Uani 1 1 d . . . 
C6 C 0.6902(3) 0.2130(3) 0.80090(14) 0.0351(8) Uani 1 1 d . . . 
H6 H 0.6935 0.1582 0.7801 0.042 Uiso 1 1 calc R . . 
C19 C 0.2461(3) 0.2539(3) 0.88669(13) 0.0266(7) Uani 1 1 d . . . 
C5 C 0.7289(3) 0.3020(3) 0.78357(13) 0.0268(7) Uani 1 1 d . . . 
C22 C 0.2324(3) 0.1047(3) 0.81348(13) 0.0281(7) Uani 1 1 d . . . 
F7 F 0.3988(2) 0.0390(3) 0.75014(12) 0.0693(9) Uani 1 1 d . . . 
F12 F 0.0449(2) -0.0251(2) 0.80153(11) 0.0599(7) Uani 1 1 d . . . 
C3 C 0.6808(3) 0.3745(3) 0.86311(14) 0.0347(8) Uani 1 1 d . . . 
H3 H 0.6781 0.4289 0.8841 0.042 Uiso 1 1 calc R . . 
F8 F 0.3691(3) -0.0785(2) 0.80130(12) 0.0725(9) Uani 1 1 d . . . 
C24 C 0.1582(3) 0.2475(3) 0.85247(13) 0.0258(7) Uani 1 1 d . . . 
H24 H 0.1030 0.2934 0.8537 0.031 Uiso 1 1 calc R . . 
C4 C 0.7244(3) 0.3824(3) 0.81557(15) 0.0366(9) Uani 1 1 d . . . 
H4 H 0.7510 0.4422 0.8049 0.044 Uiso 1 1 calc R . . 
C37 C 0.1203(3) 0.8421(3) 1.04751(18) 0.0441(10) Uani 1 1 d . . . 
F3 F 0.8160(3) 0.4075(2) 0.66050(10) 0.0636(8) Uani 1 1 d . . . 
F9 F 0.3162(3) -0.0885(3) 0.72319(12) 0.0846(11) Uani 1 1 d . . . 
C7 C 0.6467(3) 0.2051(3) 0.84880(14) 0.0357(8) Uani 1 1 d . . . 
H7 H 0.6213 0.1453 0.8600 0.043 Uiso 1 1 calc R . . 
C10 C 0.8996(3) 0.2699(3) 0.74207(16) 0.0404(10) Uani 1 1 d . . . 
C29 C 0.2047(3) 0.1459(3) 0.70349(14) 0.0325(8) Uani 1 1 d . . . 
H29 H 0.2565 0.1816 0.7221 0.039 Uiso 1 1 calc R . . 
C35 C 0.0893(4) 0.6718(3) 1.05395(17) 0.0431(10) Uani 1 1 d . . . 
H35 H 0.0599 0.6199 1.0716 0.052 Uiso 1 1 calc R A . 
C20 C 0.3263(4) 0.1836(3) 0.88377(18) 0.0521(12) Uani 1 1 d . . . 
H20 H 0.3854 0.1856 0.9066 0.063 Uiso 1 1 calc R . . 
F10 F 0.1802(3) -0.0761(2) 0.84708(11) 0.0729(9) Uani 1 1 d . . . 
C33 C 0.0947(4) 0.0040(3) 0.69333(16) 0.0411(10) Uani 1 1 d . . . 
H33 H 0.0713 -0.0562 0.7050 0.049 Uiso 1 1 calc R . . 
C27 C 0.1451(4) -0.0559(3) 0.79917(17) 0.0498(11) Uani 1 1 d . . . 
C26 C 0.3264(4) -0.0277(4) 0.76232(18) 0.0528(12) Uani 1 1 d . . . 
C21 C 0.3196(4) 0.1105(3) 0.84731(18) 0.0494(12) Uani 1 1 d . . . 
H21 H 0.3749 0.0647 0.8457 0.059 Uiso 1 1 calc R . . 
C9 C 0.7852(3) 0.4084(3) 0.70887(15) 0.0402(9) Uani 1 1 d . . . 
C40 C 0.1957(4) 1.0354(3) 1.05090(17) 0.0446(10) Uani 1 1 d . . . 
C36 C 0.0798(4) 0.7635(3) 1.07381(19) 0.0536(12) Uani 1 1 d . A . 
H36 H 0.0464 0.7729 1.1046 0.064 Uiso 1 1 calc R . . 
C39 C 0.1795(4) 0.7286(3) 0.98640(17) 0.0419(10) Uani 1 1 d . . . 
H39 H 0.2160 0.7167 0.9566 0.050 Uiso 1 1 calc R A . 
C38 C 0.1713(4) 0.8234(3) 1.00275(18) 0.0491(11) Uani 1 1 d . A . 
H38 H 0.1998 0.8741 0.9839 0.059 Uiso 1 1 calc R . . 
F11 F 0.1425(3) -0.14189(18) 0.77500(12) 0.0712(9) Uani 1 1 d . . . 
H9B H 0.341(4) 0.472(3) 0.971(2) 0.107 Uiso 1 1 d D . . 
H9A H 0.350(4) 0.550(4) 1.0074(18) 0.107 Uiso 1 1 d D . . 
S1 S 0.1080(5) 0.9539(4) 1.0796(3) 0.0615(13) Uani 0.525(11) 1 d P A 1 
S1A S 0.0818(5) 0.9612(4) 1.0670(4) 0.0636(19) Uani 0.475(11) 1 d P A 2 
 
loop_ 
 _atom_site_aniso_label 
 _atom_site_aniso_U_11 
 _atom_site_aniso_U_22 
 _atom_site_aniso_U_33 
 _atom_site_aniso_U_23 
 _atom_site_aniso_U_13 
 _atom_site_aniso_U_12 
O3 0.0393(14) 0.0436(15) 0.0270(13) -0.0011(11) -0.0095(11) -0.0154(12) 
C17 0.039(2) 0.0188(16) 0.0264(17) 0.0013(13) -0.0068(15) -0.0019(14) 
C14 0.0298(17) 0.0262(17) 0.0226(16) -0.0014(13) -0.0027(13) -0.0023(14) 
C15 0.0315(18) 0.0301(18) 0.0268(17) -0.0066(14) 0.0027(14) 0.0058(14) 
C13 0.0241(17) 0.049(2) 0.0333(19) -0.0125(17) -0.0017(14) -0.0013(16) 
C12 0.0234(17) 0.045(2) 0.0327(19) -0.0140(16) 0.0015(14) 0.0022(15) 
C16 0.0209(15) 0.0374(19) 0.0302(18) -0.0028(15) 0.0019(13) 0.0009(14) 
C11 0.0226(16) 0.0289(17) 0.0237(16) -0.0034(14) -0.0026(13) -0.0015(13) 
O7 0.0405(14) 0.0427(15) 0.0286(13) 0.0049(12) -0.0057(11) -0.0062(12) 
O8 0.0312(13) 0.0406(14) 0.0265(12) 0.0057(11) -0.0081(10) -0.0035(11) 
C34 0.0284(17) 0.036(2) 0.0255(17) -0.0034(15) 0.0036(14) 0.0054(15) 
C31 0.0290(17) 0.0324(18) 0.0231(16) -0.0036(14) -0.0014(13) 0.0038(14) 
C32 0.047(2) 0.037(2) 0.034(2) -0.0017(17) -0.0167(17) -0.0089(18) 
C30 0.0374(19) 0.0335(19) 0.0272(18) -0.0024(15) -0.0016(15) -0.0037(16) 
O4 0.0545(17) 0.0428(16) 0.0301(14) -0.0159(12) 0.0005(12) 0.0022(13) 
N2 0.0337(16) 0.0265(15) 0.0371(17) -0.0047(13) 0.0029(13) -0.0049(12) 
C43 0.040(2) 0.0283(19) 0.048(2) -0.0033(17) 0.0082(18) 0.0019(16) 
C42 0.038(2) 0.035(2) 0.043(2) -0.0017(17) 0.0020(17) 0.0037(17) 
C44 0.038(2) 0.036(2) 0.065(3) -0.013(2) 0.017(2) -0.0028(17) 
C41 0.061(3) 0.0257(19) 0.050(2) -0.0023(17) 0.009(2) 0.0013(18) 
Zn1 0.0347(2) 0.0370(3) 0.0355(2) -0.00307(18) -0.00248(18) -0.00044(18) 
Zn2 0.0317(2) 0.0319(2) 0.0332(2) 0.00000(17) -0.00290(18) 0.00043(17) 
O5 0.0328(12) 0.0293(13) 0.0377(14) -0.0112(10) -0.0119(9) 0.0010(10) 
O1 0.0340(13) 0.0373(14) 0.0303(13) -0.0109(11) 0.0020(10) -0.0038(11) 
C25 0.039(2) 0.0263(17) 0.0296(18) -0.0081(14) -0.0136(15) 0.0083(15) 
O6 0.0297(8) 0.0300(9) 0.0324(9) -0.0064(7) -0.0029(7) 0.0019(7) 
O2 0.0309(12) 0.0338(14) 0.0281(12) -0.0018(10) -0.0002(10) 0.0011(11) 
O9 0.0241(12) 0.0337(14) 0.0623(18) -0.0193(13) -0.0060(12) 0.0001(11) 
C8 0.0226(16) 0.0280(17) 0.0270(17) -0.0041(14) -0.0039(13) -0.0021(13) 
F4 0.0361(13) 0.0746(18) 0.0596(16) -0.0270(14) -0.0206(12) 0.0024(12) 
N1 0.0297(15) 0.0263(15) 0.0370(16) -0.0049(13) 0.0017(13) -0.0009(12) 
F6 0.0422(13) 0.0495(15) 0.0619(16) -0.0067(12) -0.0152(12) 0.0174(11) 
C18 0.0261(16) 0.0239(16) 0.0240(16) -0.0019(13) -0.0043(13) 0.0017(13) 
F5 0.0266(11) 0.081(2) 0.0688(17) -0.0227(15) 0.0103(12) -0.0114(12) 
C28 0.0340(18) 0.0287(18) 0.0233(16) -0.0065(14) -0.0065(14) 0.0064(14) 
C23 0.0274(17) 0.0336(19) 0.0272(17) -0.0060(14) -0.0108(14) 0.0056(14) 
F1 0.0586(16) 0.0399(14) 0.0667(17) 0.0070(12) -0.0112(13) 0.0097(12) 
C1 0.0238(16) 0.039(2) 0.0255(17) -0.0067(15) -0.0074(13) -0.0007(14) 
F2 0.0610(16) 0.0404(13) 0.0550(15) -0.0041(11) 0.0022(12) -0.0221(12) 
C2 0.0297(17) 0.0344(19) 0.0261(17) -0.0059(14) -0.0025(14) -0.0021(14) 
C6 0.050(2) 0.0239(18) 0.0311(19) -0.0086(14) 0.0035(16) -0.0038(16) 
C19 0.0260(16) 0.0259(17) 0.0271(17) -0.0057(14) -0.0068(13) 0.0018(14) 
C5 0.0271(16) 0.0272(17) 0.0259(17) -0.0039(14) -0.0026(13) -0.0014(14) 
C22 0.0317(17) 0.0276(17) 0.0245(16) -0.0058(14) -0.0073(14) 0.0061(14) 
F7 0.0409(14) 0.100(2) 0.0668(18) -0.0172(17) 0.0010(13) 0.0225(16) 
F12 0.0607(17) 0.0580(17) 0.0608(17) 0.0070(14) -0.0020(14) -0.0173(14) 
C3 0.041(2) 0.0297(19) 0.0335(19) -0.0130(15) 0.0038(16) -0.0046(16) 
F8 0.081(2) 0.0576(17) 0.0760(19) -0.0206(15) -0.0357(16) 0.0454(15) 
C24 0.0242(16) 0.0277(17) 0.0251(16) -0.0021(14) -0.0031(13) 0.0063(13) 
C4 0.042(2) 0.0270(18) 0.041(2) -0.0059(16) 0.0052(17) -0.0076(16) 
C37 0.041(2) 0.0275(19) 0.065(3) -0.0124(19) 0.019(2) -0.0082(16) 
F3 0.098(2) 0.0562(17) 0.0374(14) 0.0074(12) 0.0131(14) -0.0203(15) 
F9 0.087(2) 0.090(2) 0.075(2) -0.0569(18) -0.0264(17) 0.0496(19) 
C7 0.048(2) 0.0293(19) 0.0299(19) -0.0042(15) 0.0038(16) -0.0080(16) 
C10 0.0260(18) 0.053(3) 0.042(2) -0.0132(19) -0.0057(16) -0.0012(17) 
C29 0.0346(18) 0.0337(19) 0.0286(18) -0.0083(15) -0.0068(15) -0.0047(15) 
C35 0.052(2) 0.030(2) 0.049(2) -0.0043(18) 0.018(2) -0.0095(18) 
C20 0.042(2) 0.054(3) 0.057(3) -0.030(2) -0.034(2) 0.024(2) 
F10 0.112(3) 0.0596(18) 0.0452(15) 0.0177(13) -0.0303(16) -0.0164(17) 
C33 0.056(3) 0.031(2) 0.036(2) 0.0009(16) -0.0186(18) -0.0066(17) 
C27 0.076(3) 0.034(2) 0.038(2) 0.0028(18) -0.018(2) -0.005(2) 
C26 0.053(3) 0.056(3) 0.048(3) -0.022(2) -0.016(2) 0.027(2) 
C21 0.043(2) 0.046(2) 0.057(3) -0.028(2) -0.025(2) 0.0244(19) 
C9 0.048(2) 0.034(2) 0.038(2) -0.0001(17) 0.0014(18) -0.0095(18) 
C40 0.054(2) 0.028(2) 0.053(2) -0.0156(18) 0.020(2) -0.0122(18) 
C36 0.063(3) 0.040(2) 0.060(3) -0.015(2) 0.034(2) -0.016(2) 
C39 0.050(2) 0.034(2) 0.043(2) -0.0050(17) 0.0129(19) -0.0073(18) 
C38 0.066(3) 0.027(2) 0.055(3) -0.0020(18) 0.022(2) -0.0121(19) 
F11 0.113(3) 0.0255(13) 0.0722(19) -0.0021(12) -0.0342(18) -0.0047(14) 
S1 0.073(3) 0.0327(17) 0.082(3) -0.0203(15) 0.046(2) -0.0143(17) 
S1A 0.051(2) 0.0276(17) 0.115(5) -0.019(2) 0.043(2) -0.0107(14) 
 
_geom_special_details 
; 
 All esds (except the esd in the dihedral angle between two l.s. planes) 
 are estimated using the full covariance matrix.  The cell esds are taken 
 into account individually in the estimation of esds in distances, angles 
 and torsion angles; correlations between esds in cell parameters are only 
 used when they are defined by crystal symmetry.  An approximate (isotropic) 
 treatment of cell esds is used for estimating esds involving l.s. planes. 
; 
 
loop_ 
 _geom_bond_atom_site_label_1 
 _geom_bond_atom_site_label_2 
 _geom_bond_distance 
 _geom_bond_site_symmetry_2 
 _geom_bond_publ_flag 
O3 C17 1.245(5) . ? 
O3 Zn2 1.995(2) 2_546 ? 
C17 O4 1.257(5) . ? 
C17 C14 1.498(5) . ? 
C14 C15 1.383(5) . ? 
C14 C13 1.388(5) . ? 
C15 C16 1.375(5) . ? 
C15 H15 0.9300 . ? 
C13 C12 1.383(5) . ? 
C13 H13 0.9300 . ? 
C12 C11 1.398(5) . ? 
C12 H12 0.9300 . ? 
C16 C11 1.388(5) . ? 
C16 H16 0.9300 . ? 
C11 C8 1.546(5) . ? 
O7 C34 1.245(5) . ? 
O7 Zn1 2.187(3) 4_565 ? 
O8 C34 1.274(4) . ? 
O8 Zn1 2.064(2) 4_565 ? 
C34 C31 1.500(5) . ? 
C34 Zn1 2.447(4) 4_565 ? 
C31 C32 1.382(6) . ? 
C31 C30 1.384(5) . ? 
C32 C33 1.390(6) . ? 
C32 H32 0.9300 . ? 
C30 C29 1.387(5) . ? 
C30 H30 0.9300 . ? 
O4 Zn2 1.965(3) 4_665 ? 
N2 C42 1.338(5) . ? 
N2 C43 1.344(5) . ? 
N2 Zn1 2.084(3) 1_565 ? 
C43 C44 1.384(6) . ? 
C43 H43 0.9300 . ? 
C42 C41 1.384(6) . ? 
C42 H42 0.9300 . ? 
C44 C40 1.383(6) . ? 
C44 H44 0.9300 . ? 
C41 C40 1.374(7) . ? 
C41 H41 0.9300 . ? 
Zn1 O5 2.058(2) . ? 
Zn1 O8 2.064(3) 4_666 ? 
Zn1 N2 2.084(3) 1_545 ? 
Zn1 O2 2.113(2) . ? 
Zn1 O7 2.187(3) 4_666 ? 
Zn1 O1 2.197(3) . ? 
Zn1 C34 2.447(4) 4_666 ? 
Zn2 O4 1.965(3) 4_566 ? 
Zn2 O9 1.990(3) . ? 
Zn2 O3 1.995(2) 2_556 ? 
Zn2 O6 2.094(2) . ? 
Zn2 N1 2.162(3) . ? 
O5 C18 1.267(4) . ? 
O1 C1 1.255(4) . ? 
C25 C26 1.542(6) . ? 
C25 C28 1.544(5) . ? 
C25 C22 1.548(5) . ? 
C25 C27 1.551(6) . ? 
O6 C18 1.247(4) . ? 
O2 C1 1.261(5) . ? 
O9 H9B 0.884(19) . ? 
O9 H9A 0.88(2) . ? 
C8 C5 1.539(5) . ? 
C8 C10 1.542(5) . ? 
C8 C9 1.547(5) . ? 
F4 C10 1.335(5) . ? 
N1 C39 1.329(5) . ? 
N1 C35 1.332(5) . ? 
F6 C10 1.326(5) . ? 
C18 C19 1.500(5) . ? 
F5 C10 1.329(5) . ? 
C28 C29 1.385(5) . ? 
C28 C33 1.390(5) . ? 
C23 C24 1.377(5) . ? 
C23 C22 1.383(5) . ? 
C23 H23 0.9300 . ? 
F1 C9 1.322(5) . ? 
C1 C2 1.501(5) . ? 
F2 C9 1.338(5) . ? 
C2 C7 1.380(5) . ? 
C2 C3 1.381(5) . ? 
C6 C7 1.389(5) . ? 
C6 C5 1.393(5) . ? 
C6 H6 0.9300 . ? 
C19 C20 1.387(5) . ? 
C19 C24 1.388(5) . ? 
C5 C4 1.388(5) . ? 
C22 C21 1.375(5) . ? 
F7 C26 1.328(7) . ? 
F12 C27 1.314(6) . ? 
C3 C4 1.381(6) . ? 
C3 H3 0.9300 . ? 
F8 C26 1.330(6) . ? 
C24 H24 0.9300 . ? 
C4 H4 0.9300 . ? 
C37 C38 1.377(6) . ? 
C37 C36 1.383(6) . ? 
C37 S1 1.759(7) . ? 
C37 S1A 1.782(7) . ? 
F3 C9 1.338(5) . ? 
F9 C26 1.324(5) . ? 
C7 H7 0.9300 . ? 
C29 H29 0.9300 . ? 
C35 C36 1.367(6) . ? 
C35 H35 0.9300 . ? 
C20 C21 1.386(6) . ? 
C20 H20 0.9300 . ? 
F10 C27 1.343(5) . ? 
C33 H33 0.9300 . ? 
C27 F11 1.338(5) . ? 
C21 H21 0.9300 . ? 
C40 S1 1.749(7) . ? 
C40 S1A 1.803(8) . ? 
C36 H36 0.9300 . ? 
C39 C38 1.374(6) . ? 
C39 H39 0.9300 . ? 
C38 H38 0.9300 . ? 
 
loop_ 
 _geom_angle_atom_site_label_1 
 _geom_angle_atom_site_label_2 
 _geom_angle_atom_site_label_3 
 _geom_angle 
 _geom_angle_site_symmetry_1 
 _geom_angle_site_symmetry_3 
 _geom_angle_publ_flag 
C17 O3 Zn2 125.4(2) . 2_546 ? 
O3 C17 O4 124.8(3) . . ? 
O3 C17 C14 118.3(3) . . ? 
O4 C17 C14 116.9(3) . . ? 
C15 C14 C13 118.9(3) . . ? 
C15 C14 C17 120.0(3) . . ? 
C13 C14 C17 121.0(3) . . ? 
C16 C15 C14 121.1(3) . . ? 
C16 C15 H15 119.4 . . ? 
C14 C15 H15 119.4 . . ? 
C12 C13 C14 120.4(3) . . ? 
C12 C13 H13 119.8 . . ? 
C14 C13 H13 119.8 . . ? 
C13 C12 C11 120.5(3) . . ? 
C13 C12 H12 119.7 . . ? 
C11 C12 H12 119.7 . . ? 
C15 C16 C11 120.5(3) . . ? 
C15 C16 H16 119.7 . . ? 
C11 C16 H16 119.7 . . ? 
C16 C11 C12 118.5(3) . . ? 
C16 C11 C8 122.6(3) . . ? 
C12 C11 C8 118.7(3) . . ? 
C34 O7 Zn1 86.4(2) . 4_565 ? 
C34 O8 Zn1 91.1(2) . 4_565 ? 
O7 C34 O8 120.5(3) . . ? 
O7 C34 C31 120.5(3) . . ? 
O8 C34 C31 119.0(3) . . ? 
O7 C34 Zn1 63.12(19) . 4_565 ? 
O8 C34 Zn1 57.48(17) . 4_565 ? 
C31 C34 Zn1 175.3(3) . 4_565 ? 
C32 C31 C30 119.3(3) . . ? 
C32 C31 C34 120.0(3) . . ? 
C30 C31 C34 120.7(3) . . ? 
C31 C32 C33 120.7(3) . . ? 
C31 C32 H32 119.7 . . ? 
C33 C32 H32 119.7 . . ? 
C31 C30 C29 119.9(4) . . ? 
C31 C30 H30 120.0 . . ? 
C29 C30 H30 120.0 . . ? 
C17 O4 Zn2 159.6(3) . 4_665 ? 
C42 N2 C43 117.6(3) . . ? 
C42 N2 Zn1 122.5(3) . 1_565 ? 
C43 N2 Zn1 119.9(3) . 1_565 ? 
N2 C43 C44 122.6(4) . . ? 
N2 C43 H43 118.7 . . ? 
C44 C43 H43 118.7 . . ? 
N2 C42 C41 123.4(4) . . ? 
N2 C42 H42 118.3 . . ? 
C41 C42 H42 118.3 . . ? 
C40 C44 C43 118.7(4) . . ? 
C40 C44 H44 120.7 . . ? 
C43 C44 H44 120.7 . . ? 
C40 C41 C42 118.3(4) . . ? 
C40 C41 H41 120.8 . . ? 
C42 C41 H41 120.8 . . ? 
O5 Zn1 O8 99.16(10) . 4_666 ? 
O5 Zn1 N2 91.87(12) . 1_545 ? 
O8 Zn1 N2 102.62(11) 4_666 1_545 ? 
O5 Zn1 O2 101.67(10) . . ? 
O8 Zn1 O2 145.30(10) 4_666 . ? 
N2 Zn1 O2 104.11(11) 1_545 . ? 
O5 Zn1 O7 160.91(10) . 4_666 ? 
O8 Zn1 O7 61.86(10) 4_666 4_666 ? 
N2 Zn1 O7 94.37(12) 1_545 4_666 ? 
O2 Zn1 O7 94.28(10) . 4_666 ? 
O5 Zn1 O1 85.08(11) . . ? 
O8 Zn1 O1 93.83(10) 4_666 . ? 
N2 Zn1 O1 163.55(11) 1_545 . ? 
O2 Zn1 O1 60.95(10) . . ? 
O7 Zn1 O1 93.69(10) 4_666 . ? 
O5 Zn1 C34 130.42(11) . 4_666 ? 
O8 Zn1 C34 31.37(11) 4_666 4_666 ? 
N2 Zn1 C34 100.93(12) 1_545 4_666 ? 
O2 Zn1 C34 120.57(11) . 4_666 ? 
O7 Zn1 C34 30.52(11) 4_666 4_666 ? 
O1 Zn1 C34 93.27(10) . 4_666 ? 
O4 Zn2 O9 109.26(13) 4_566 . ? 
O4 Zn2 O3 121.84(12) 4_566 2_556 ? 
O9 Zn2 O3 128.88(13) . 2_556 ? 
O4 Zn2 O6 95.09(11) 4_566 . ? 
O9 Zn2 O6 88.79(10) . . ? 
O3 Zn2 O6 88.03(10) 2_556 . ? 
O4 Zn2 N1 95.30(12) 4_566 . ? 
O9 Zn2 N1 87.47(11) . . ? 
O3 Zn2 N1 86.77(12) 2_556 . ? 
O6 Zn2 N1 169.60(11) . . ? 
C18 O5 Zn1 147.1(2) . . ? 
C1 O1 Zn1 86.7(2) . . ? 
C26 C25 C28 106.3(3) . . ? 
C26 C25 C22 112.0(3) . . ? 
C28 C25 C22 112.1(3) . . ? 
C26 C25 C27 108.2(4) . . ? 
C28 C25 C27 112.2(3) . . ? 
C22 C25 C27 106.0(3) . . ? 
C18 O6 Zn2 130.8(2) . . ? 
C1 O2 Zn1 90.2(2) . . ? 
Zn2 O9 H9B 109(4) . . ? 
Zn2 O9 H9A 129(4) . . ? 
H9B O9 H9A 108(3) . . ? 
C5 C8 C10 105.4(3) . . ? 
C5 C8 C11 112.5(3) . . ? 
C10 C8 C11 111.8(3) . . ? 
C5 C8 C9 112.1(3) . . ? 
C10 C8 C9 108.5(3) . . ? 
C11 C8 C9 106.6(3) . . ? 
C39 N1 C35 116.8(3) . . ? 
C39 N1 Zn2 117.6(3) . . ? 
C35 N1 Zn2 125.6(3) . . ? 
O6 C18 O5 124.1(3) . . ? 
O6 C18 C19 117.6(3) . . ? 
O5 C18 C19 118.2(3) . . ? 
C29 C28 C33 118.5(3) . . ? 
C29 C28 C25 118.8(3) . . ? 
C33 C28 C25 122.7(3) . . ? 
C24 C23 C22 121.4(3) . . ? 
C24 C23 H23 119.3 . . ? 
C22 C23 H23 119.3 . . ? 
O1 C1 O2 120.8(3) . . ? 
O1 C1 C2 119.1(3) . . ? 
O2 C1 C2 120.0(3) . . ? 
C7 C2 C3 119.7(3) . . ? 
C7 C2 C1 121.0(3) . . ? 
C3 C2 C1 119.2(3) . . ? 
C7 C6 C5 120.9(3) . . ? 
C7 C6 H6 119.6 . . ? 
C5 C6 H6 119.6 . . ? 
C20 C19 C24 117.8(3) . . ? 
C20 C19 C18 121.2(3) . . ? 
C24 C19 C18 121.0(3) . . ? 
C4 C5 C6 118.4(3) . . ? 
C4 C5 C8 123.2(3) . . ? 
C6 C5 C8 118.2(3) . . ? 
C21 C22 C23 118.2(3) . . ? 
C21 C22 C25 122.8(3) . . ? 
C23 C22 C25 118.9(3) . . ? 
C2 C3 C4 120.6(3) . . ? 
C2 C3 H3 119.7 . . ? 
C4 C3 H3 119.7 . . ? 
C23 C24 C19 120.7(3) . . ? 
C23 C24 H24 119.7 . . ? 
C19 C24 H24 119.7 . . ? 
C3 C4 C5 120.6(4) . . ? 
C3 C4 H4 119.7 . . ? 
C5 C4 H4 119.7 . . ? 
C38 C37 C36 117.8(4) . . ? 
C38 C37 S1 128.4(4) . . ? 
C36 C37 S1 113.6(4) . . ? 
C38 C37 S1A 123.4(4) . . ? 
C36 C37 S1A 117.7(4) . . ? 
S1 C37 S1A 15.1(4) . . ? 
C2 C7 C6 119.8(4) . . ? 
C2 C7 H7 120.1 . . ? 
C6 C7 H7 120.1 . . ? 
F6 C10 F5 107.3(3) . . ? 
F6 C10 F4 107.0(3) . . ? 
F5 C10 F4 106.4(3) . . ? 
F6 C10 C8 111.0(3) . . ? 
F5 C10 C8 113.3(3) . . ? 
F4 C10 C8 111.5(3) . . ? 
C28 C29 C30 121.2(3) . . ? 
C28 C29 H29 119.4 . . ? 
C30 C29 H29 119.4 . . ? 
N1 C35 C36 123.5(4) . . ? 
N1 C35 H35 118.2 . . ? 
C36 C35 H35 118.2 . . ? 
C21 C20 C19 121.1(3) . . ? 
C21 C20 H20 119.5 . . ? 
C19 C20 H20 119.5 . . ? 
C28 C33 C32 120.3(4) . . ? 
C28 C33 H33 119.8 . . ? 
C32 C33 H33 119.8 . . ? 
F12 C27 F11 107.3(4) . . ? 
F12 C27 F10 107.2(4) . . ? 
F11 C27 F10 105.2(4) . . ? 
F12 C27 C25 111.5(3) . . ? 
F11 C27 C25 113.8(4) . . ? 
F10 C27 C25 111.3(4) . . ? 
F9 C26 F8 106.9(4) . . ? 
F9 C26 F7 107.1(4) . . ? 
F8 C26 F7 107.0(4) . . ? 
F9 C26 C25 111.7(4) . . ? 
F8 C26 C25 113.5(4) . . ? 
F7 C26 C25 110.4(4) . . ? 
C22 C21 C20 120.8(4) . . ? 
C22 C21 H21 119.6 . . ? 
C20 C21 H21 119.6 . . ? 
F1 C9 F2 107.0(3) . . ? 
F1 C9 F3 106.7(3) . . ? 
F2 C9 F3 106.2(3) . . ? 
F1 C9 C8 111.6(3) . . ? 
F2 C9 C8 113.5(3) . . ? 
F3 C9 C8 111.5(3) . . ? 
C41 C40 C44 119.4(4) . . ? 
C41 C40 S1 119.0(4) . . ? 
C44 C40 S1 120.5(4) . . ? 
C41 C40 S1A 129.5(4) . . ? 
C44 C40 S1A 111.1(4) . . ? 
S1 C40 S1A 15.0(4) . . ? 
C35 C36 C37 119.2(4) . . ? 
C35 C36 H36 120.4 . . ? 
C37 C36 H36 120.4 . . ? 
N1 C39 C38 123.8(4) . . ? 
N1 C39 H39 118.1 . . ? 
C38 C39 H39 118.1 . . ? 
C39 C38 C37 118.9(4) . . ? 
C39 C38 H38 120.5 . . ? 
C37 C38 H38 120.5 . . ? 
C37 S1 C40 106.6(4) . . ? 
C37 S1A C40 103.3(4) . . ? 
 
loop_ 
 _geom_torsion_atom_site_label_1 
 _geom_torsion_atom_site_label_2 
 _geom_torsion_atom_site_label_3 
 _geom_torsion_atom_site_label_4 
 _geom_torsion 
 _geom_torsion_site_symmetry_1 
 _geom_torsion_site_symmetry_2 
 _geom_torsion_site_symmetry_3 
 _geom_torsion_site_symmetry_4 
 _geom_torsion_publ_flag 
Zn2 O3 C17 O4 -9.6(5) 2_546 . . . ? 
Zn2 O3 C17 C14 169.3(2) 2_546 . . . ? 
O3 C17 C14 C15 161.7(3) . . . . ? 
O4 C17 C14 C15 -19.4(5) . . . . ? 
O3 C17 C14 C13 -20.7(5) . . . . ? 
O4 C17 C14 C13 158.3(4) . . . . ? 
C13 C14 C15 C16 0.2(6) . . . . ? 
C17 C14 C15 C16 177.9(3) . . . . ? 
C15 C14 C13 C12 0.9(6) . . . . ? 
C17 C14 C13 C12 -176.8(4) . . . . ? 
C14 C13 C12 C11 -1.5(6) . . . . ? 
C14 C15 C16 C11 -0.6(6) . . . . ? 
C15 C16 C11 C12 0.0(6) . . . . ? 
C15 C16 C11 C8 -175.3(3) . . . . ? 
C13 C12 C11 C16 1.1(6) . . . . ? 
C13 C12 C11 C8 176.6(4) . . . . ? 
Zn1 O7 C34 O8 -3.6(3) 4_565 . . . ? 
Zn1 O7 C34 C31 176.5(3) 4_565 . . . ? 
Zn1 O8 C34 O7 3.9(3) 4_565 . . . ? 
Zn1 O8 C34 C31 -176.3(3) 4_565 . . . ? 
O7 C34 C31 C32 -175.1(4) . . . . ? 
O8 C34 C31 C32 5.1(5) . . . . ? 
Zn1 C34 C31 C32 -36(3) 4_565 . . . ? 
O7 C34 C31 C30 6.2(5) . . . . ? 
O8 C34 C31 C30 -173.7(3) . . . . ? 
Zn1 C34 C31 C30 145(3) 4_565 . . . ? 
C30 C31 C32 C33 3.3(6) . . . . ? 
C34 C31 C32 C33 -175.5(4) . . . . ? 
C32 C31 C30 C29 -2.7(6) . . . . ? 
C34 C31 C30 C29 176.1(3) . . . . ? 
O3 C17 O4 Zn2 -40.1(10) . . . 4_665 ? 
C14 C17 O4 Zn2 141.0(7) . . . 4_665 ? 
C42 N2 C43 C44 -1.8(6) . . . . ? 
Zn1 N2 C43 C44 176.9(3) 1_565 . . . ? 
C43 N2 C42 C41 1.7(6) . . . . ? 
Zn1 N2 C42 C41 -177.0(3) 1_565 . . . ? 
N2 C43 C44 C40 1.2(7) . . . . ? 
N2 C42 C41 C40 -1.0(7) . . . . ? 
O8 Zn1 O5 C18 -129.0(4) 4_666 . . . ? 
N2 Zn1 O5 C18 -25.9(4) 1_545 . . . ? 
O2 Zn1 O5 C18 78.9(4) . . . . ? 
O7 Zn1 O5 C18 -135.0(4) 4_666 . . . ? 
O1 Zn1 O5 C18 137.9(4) . . . . ? 
C34 Zn1 O5 C18 -132.0(4) 4_666 . . . ? 
O5 Zn1 O1 C1 -99.6(2) . . . . ? 
O8 Zn1 O1 C1 161.6(2) 4_666 . . . ? 
N2 Zn1 O1 C1 -19.7(5) 1_545 . . . ? 
O2 Zn1 O1 C1 6.71(19) . . . . ? 
O7 Zn1 O1 C1 99.6(2) 4_666 . . . ? 
C34 Zn1 O1 C1 130.1(2) 4_666 . . . ? 
O4 Zn2 O6 C18 -88.8(3) 4_566 . . . ? 
O9 Zn2 O6 C18 20.4(3) . . . . ? 
O3 Zn2 O6 C18 149.4(3) 2_556 . . . ? 
N1 Zn2 O6 C18 89.3(6) . . . . ? 
O5 Zn1 O2 C1 70.9(2) . . . . ? 
O8 Zn1 O2 C1 -54.8(3) 4_666 . . . ? 
N2 Zn1 O2 C1 165.9(2) 1_545 . . . ? 
O7 Zn1 O2 C1 -98.5(2) 4_666 . . . ? 
O1 Zn1 O2 C1 -6.66(18) . . . . ? 
C34 Zn1 O2 C1 -82.1(2) 4_666 . . . ? 
C16 C11 C8 C5 -142.8(3) . . . . ? 
C12 C11 C8 C5 42.0(4) . . . . ? 
C16 C11 C8 C10 -24.4(5) . . . . ? 
C12 C11 C8 C10 160.3(3) . . . . ? 
C16 C11 C8 C9 94.0(4) . . . . ? 
C12 C11 C8 C9 -81.3(4) . . . . ? 
O4 Zn2 N1 C39 171.1(3) 4_566 . . . ? 
O9 Zn2 N1 C39 62.0(3) . . . . ? 
O3 Zn2 N1 C39 -67.2(3) 2_556 . . . ? 
O6 Zn2 N1 C39 -7.0(8) . . . . ? 
O4 Zn2 N1 C35 -11.6(3) 4_566 . . . ? 
O9 Zn2 N1 C35 -120.7(3) . . . . ? 
O3 Zn2 N1 C35 110.1(3) 2_556 . . . ? 
O6 Zn2 N1 C35 170.3(5) . . . . ? 
Zn2 O6 C18 O5 2.8(5) . . . . ? 
Zn2 O6 C18 C19 -175.9(2) . . . . ? 
Zn1 O5 C18 O6 128.0(4) . . . . ? 
Zn1 O5 C18 C19 -53.4(6) . . . . ? 
C26 C25 C28 C29 -82.0(4) . . . . ? 
C22 C25 C28 C29 40.7(5) . . . . ? 
C27 C25 C28 C29 159.9(3) . . . . ? 
C26 C25 C28 C33 95.2(5) . . . . ? 
C22 C25 C28 C33 -142.1(4) . . . . ? 
C27 C25 C28 C33 -22.9(5) . . . . ? 
Zn1 O1 C1 O2 -11.5(3) . . . . ? 
Zn1 O1 C1 C2 164.2(3) . . . . ? 
Zn1 O2 C1 O1 11.9(3) . . . . ? 
Zn1 O2 C1 C2 -163.8(3) . . . . ? 
O1 C1 C2 C7 -172.5(3) . . . . ? 
O2 C1 C2 C7 3.3(5) . . . . ? 
O1 C1 C2 C3 3.8(5) . . . . ? 
O2 C1 C2 C3 179.6(3) . . . . ? 
O6 C18 C19 C20 -172.3(4) . . . . ? 
O5 C18 C19 C20 9.0(6) . . . . ? 
O6 C18 C19 C24 7.0(5) . . . . ? 
O5 C18 C19 C24 -171.7(3) . . . . ? 
C7 C6 C5 C4 0.8(6) . . . . ? 
C7 C6 C5 C8 176.4(3) . . . . ? 
C10 C8 C5 C4 93.4(4) . . . . ? 
C11 C8 C5 C4 -144.6(4) . . . . ? 
C9 C8 C5 C4 -24.5(5) . . . . ? 
C10 C8 C5 C6 -81.9(4) . . . . ? 
C11 C8 C5 C6 40.1(4) . . . . ? 
C9 C8 C5 C6 160.2(3) . . . . ? 
C24 C23 C22 C21 0.3(6) . . . . ? 
C24 C23 C22 C25 177.1(3) . . . . ? 
C26 C25 C22 C21 -22.8(6) . . . . ? 
C28 C25 C22 C21 -142.2(4) . . . . ? 
C27 C25 C22 C21 95.0(5) . . . . ? 
C26 C25 C22 C23 160.5(4) . . . . ? 
C28 C25 C22 C23 41.1(5) . . . . ? 
C27 C25 C22 C23 -81.6(4) . . . . ? 
C7 C2 C3 C4 1.0(6) . . . . ? 
C1 C2 C3 C4 -175.3(4) . . . . ? 
C22 C23 C24 C19 -0.2(6) . . . . ? 
C20 C19 C24 C23 -0.5(6) . . . . ? 
C18 C19 C24 C23 -179.8(3) . . . . ? 
C2 C3 C4 C5 0.1(6) . . . . ? 
C6 C5 C4 C3 -1.1(6) . . . . ? 
C8 C5 C4 C3 -176.3(3) . . . . ? 
C3 C2 C7 C6 -1.2(6) . . . . ? 
C1 C2 C7 C6 175.0(4) . . . . ? 
C5 C6 C7 C2 0.3(6) . . . . ? 
C5 C8 C10 F6 72.4(4) . . . . ? 
C11 C8 C10 F6 -50.1(4) . . . . ? 
C9 C8 C10 F6 -167.4(3) . . . . ? 
C5 C8 C10 F5 -166.9(3) . . . . ? 
C11 C8 C10 F5 70.6(4) . . . . ? 
C9 C8 C10 F5 -46.6(4) . . . . ? 
C5 C8 C10 F4 -46.8(4) . . . . ? 
C11 C8 C10 F4 -169.3(3) . . . . ? 
C9 C8 C10 F4 73.5(4) . . . . ? 
C33 C28 C29 C30 2.2(6) . . . . ? 
C25 C28 C29 C30 179.5(3) . . . . ? 
C31 C30 C29 C28 -0.1(6) . . . . ? 
C39 N1 C35 C36 0.1(7) . . . . ? 
Zn2 N1 C35 C36 -177.3(4) . . . . ? 
C24 C19 C20 C21 1.1(7) . . . . ? 
C18 C19 C20 C21 -179.6(4) . . . . ? 
C29 C28 C33 C32 -1.6(6) . . . . ? 
C25 C28 C33 C32 -178.8(4) . . . . ? 
C31 C32 C33 C28 -1.1(7) . . . . ? 
C26 C25 C27 F12 -168.1(3) . . . . ? 
C28 C25 C27 F12 -51.1(4) . . . . ? 
C22 C25 C27 F12 71.5(4) . . . . ? 
C26 C25 C27 F11 -46.5(5) . . . . ? 
C28 C25 C27 F11 70.5(5) . . . . ? 
C22 C25 C27 F11 -166.9(3) . . . . ? 
C26 C25 C27 F10 72.2(5) . . . . ? 
C28 C25 C27 F10 -170.8(3) . . . . ? 
C22 C25 C27 F10 -48.1(5) . . . . ? 
C28 C25 C26 F9 -47.6(5) . . . . ? 
C22 C25 C26 F9 -170.3(4) . . . . ? 
C27 C25 C26 F9 73.1(5) . . . . ? 
C28 C25 C26 F8 -168.5(4) . . . . ? 
C22 C25 C26 F8 68.8(5) . . . . ? 
C27 C25 C26 F8 -47.8(5) . . . . ? 
C28 C25 C26 F7 71.4(4) . . . . ? 
C22 C25 C26 F7 -51.3(5) . . . . ? 
C27 C25 C26 F7 -167.9(3) . . . . ? 
C23 C22 C21 C20 0.3(7) . . . . ? 
C25 C22 C21 C20 -176.4(4) . . . . ? 
C19 C20 C21 C22 -1.0(8) . . . . ? 
C5 C8 C9 F1 -51.0(4) . . . . ? 
C10 C8 C9 F1 -167.1(3) . . . . ? 
C11 C8 C9 F1 72.4(4) . . . . ? 
C5 C8 C9 F2 69.9(4) . . . . ? 
C10 C8 C9 F2 -46.1(4) . . . . ? 
C11 C8 C9 F2 -166.6(3) . . . . ? 
C5 C8 C9 F3 -170.3(3) . . . . ? 
C10 C8 C9 F3 73.7(4) . . . . ? 
C11 C8 C9 F3 -46.8(4) . . . . ? 
C42 C41 C40 C44 0.4(7) . . . . ? 
C42 C41 C40 S1 -168.0(4) . . . . ? 
C42 C41 C40 S1A 178.9(5) . . . . ? 
C43 C44 C40 C41 -0.5(7) . . . . ? 
C43 C44 C40 S1 167.7(4) . . . . ? 
C43 C44 C40 S1A -179.3(5) . . . . ? 
N1 C35 C36 C37 1.7(8) . . . . ? 
C38 C37 C36 C35 -1.7(8) . . . . ? 
S1 C37 C36 C35 -176.9(5) . . . . ? 
S1A C37 C36 C35 167.0(5) . . . . ? 
C35 N1 C39 C38 -1.9(7) . . . . ? 
Zn2 N1 C39 C38 175.7(4) . . . . ? 
N1 C39 C38 C37 1.8(8) . . . . ? 
C36 C37 C38 C39 0.1(7) . . . . ? 
S1 C37 C38 C39 174.4(5) . . . . ? 
S1A C37 C38 C39 -167.9(5) . . . . ? 
C38 C37 S1 C40 -11.3(7) . . . . ? 
C36 C37 S1 C40 163.2(4) . . . . ? 
S1A C37 S1 C40 -87.6(16) . . . . ? 
C41 C40 S1 C37 -52.7(6) . . . . ? 
C44 C40 S1 C37 139.1(4) . . . . ? 
S1A C40 S1 C37 84.8(16) . . . . ? 
C38 C37 S1A C40 -41.4(7) . . . . ? 
C36 C37 S1A C40 150.6(5) . . . . ? 
S1 C37 S1A C40 72.7(14) . . . . ? 
C41 C40 S1A C37 -25.6(8) . . . . ? 
C44 C40 S1A C37 153.1(4) . . . . ? 
S1 C40 S1A C37 -75.5(14) . . . . ? 
 
_diffrn_measured_fraction_theta_max    0.999 
_diffrn_reflns_theta_full              25.10 
_diffrn_measured_fraction_theta_full   0.999 
_refine_diff_density_max    0.839 
_refine_diff_density_min   -1.023 
_refine_diff_density_rms    0.106 
